# Supplementary material for: Unprecedented multi-endpoint safety assessment of Bacillus coagulans BCM-9 dermal and oral toxicity in rabbits and rats across diverse exposure periods
Source: Research Square preprint supplement (doi:10.21203/rs.3.rs-7407305/v1), 2025-09-17
Supplement: Supplementary file 1 [file 1d1888676782b8dde12a6d81.xlsx]

## Sheet: Sheet2
	Table 1| HEAMATOLOGY
			Acute study				Sub acute study																Subchronic study
	Name of Test	Unit	Group-1: Male (Mean)	Group-1: Male (SD)	Group-1: Female (Mean)	Group-1: Female (SD)	G1-M (Mean)	G1-M (SD)	G2-M (Mean)	G2-M (SD)	G3-M (Mean)	G3-M (SD)	G4-M (Mean)	G4-M (SD)	G1-F (Mean)	G1-F (SD)	G2-F (Mean)	G2-F (SD)	G3-F (Mean)	G3-F (SD)	G4-F (Mean)	G4-F (SD)	G1-M (Mean)	G1-M (SD)	G2-M (Mean)	G2-M (SD)	G3-M (Mean)	G3-M (SD)	G4-M (Mean)	G4-M (SD)	G1-F (Mean)	G1-F (SD)	G2-F (Mean)	G2-F (SD)	G3-F (Mean)	G3-F (SD)	G4-F (Mean)	G4-F (SD)
	Hemoglobin	g%	16.63	0.61	16.48	1.13	16.49	0.62	15.83	0.53	16.04	0.38	16.08	0.32	16.02	0.23	16.08	0.32	15.86	0.37	15.4	0.14	16.02	0.41	15.68	0.29	15.79	0.69	15.81	0.63	15.02	1.25	15.68	0.7	15.92	0.32	15.33	0.48
	Total RBC	x 10<sup>6</sup> /cmm	6.05	0.36	6.85	0.27	5.99	0.42	5.79	0.41	5.75	0.26	5.82	0.43	5.81	0.31	5.82	0.43	5.75	0.56	5.89	0.28	6.86	0.29	5.86	0.52	5.79	0.37	5.9	0.5	5.88	0.2	5.73	0.24	5.66	0.5	5.91	0.56
	Rt.	%	2.18	0.08	2.12	0.12	2.22	0.13	2.26	0.14	2.29	0.17	2.28	0.12	2.21	0.24	2.28	0.12	2.24	0.1	2.18	0.07	2.13	0.18	2.25	0.22	2.31	0.17	2.28	0.1	2.13	0.17	2.25	0.16	2.21	0.19	2.23	0.19
	Hematocrit	%	53.58	1.67	50.73	2.71	51.36	2.3	50.18	1.47	50.77	1.6	51.38	1.36	51.57	1.95	51.38	1.36	48.88	3.41	50.95	2.28	51.16	2.17	50.76	1.94	50.97	1.67	51.36	1.96	52.75	2.59	50.77	1.6	46.32	2.8	49.76	1.94
	MCV	Fl	88.54	45.88	74	102.25	85.77	2.31	86.74	3.89	88.24	2.59	88.22	6.45	88.71	5.61	88.22	6.45	84.96	2.6	86.45	1.85	74.63	4.36	86.68	4.58	88.06	5.45	87.06	6.41	89.75	6.49	88.54	4.4	81.85	6.39	84.14	7.78
	MCH	pg	27.48	16.75	24.04	42.47	27.54	1.1	27.37	1.78	27.87	1.27	27.6	1.51	27.56	1.38	27.6	1.51	27.56	2.62	26.13	1.22	23.36	1.56	26.77	2.29	27.27	1.62	26.79	2.01	25.55	2.31	27.35	0.97	28.13	2.45	25.93	2.42
	MCHC	%	31.04	1.46	32.49	3.5	32.11	0.78	31.55	1.2	31.58	1.41	31.29	1.15	31.06	1.3	31.29	1.15	32.44	2.16	30.23	1.41	31.3	1.41	30.88	1.08	30.97	2.1	30.78	2.01	28.47	2.71	30.89	1.08	34.36	1.99	30.81	1.7
	Platelets	x10<sup>6</sup> /cmm	1.56	0.11	1.56	0.06	1.53	0.04	1.48	0.04	1.46	0.06	1.5	0.02	1.53	0.01	1.5	0.02	1.48	0.03	1.48	0.03	1.55	0.08	1.53	0.2	1.46	0.06	1.48	0.04	1.41	0.12	1.47	0.04	1.46	0.06	1.48	0.16
	WBC	x 10<sup>3</sup> /cmm	10.82	1.29	10.06	1.28	10.08	0.93	9.54	1.06	10.03	1.04	10.49	0.73	10.75	1.17	10.49	0.73	10.52	0.7	10.67	0.41	10.25	1.38	10.04	1.24	10.34	1.48	11.36	1.1	11.4	1.62	10.54	1.1	10.68	0.67	11.33	0.43
	Neutrophil	%	31.37	1.52	29.77	1.33	31.94	2.12	32.18	1.17	33.17	1.47	32.58	1.2	32.37	1.52	32.58	1.2	33.37	1.36	32.58	1.02	32.12	2.49	32.77	1.47	33.56	1.62	33.37	1.5	31.94	2.12	33.36	1.62	32.26	3.07	33.1	2.64
	Lymphocyte	%	60.57	2.07	62.58	1.5	61.12	3.49	61.69	3.76	60.38	1.62	60.55	2.42	58.93	3.08	60.55	2.42	60.5	3.5	60.78	1.6	61.06	4.49	62.93	3.03	61.26	4.18	61.61	11.77	58.95	2.83	60.28	3.77	59.46	3.98	59.74	2.79
	Eosinophil	%	1.32	0.24	1.26	0.24	1.39	0.2	1.31	0.12	1.28	0.1	1.39	0.18	1.34	0.11	1.39	0.18	1.27	0.12	1.35	0.14	1.29	0.16	1.3	0.09	1.25	0.14	1.33	0.21	1.26	0.11	1.27	0.12	1.22	0.24	1.27	0.12
	Monocyte	%	6.01	0.29	5.94	0.41	6.12	0.19	6.03	0.27	5.86	0.14	6.06	0.24	5.93	0.34	6.06	0.24	5.95	0.26	6.22	0.23	5.96	0.18	5.76	0.65	5.98	0.19	6.15	0.43	5.92	0.24	5.93	0.34	6.22	0.45	6.05	0.36
	Basophil	%	0.27	0.08	0.34	0.1	0.25	0.13	0.26	0.05	0.23	0.14	0.27	0.07	0.19	0.13	0.27	0.07	0.22	0.08	0.24	0.1	0.25	0.09	0.25	0.12	0.23	0.12	0.25	0.12	0.16	0.08	0.21	0.16	0.25	0.12	0.25	0.13
	Bleeding time	min	2.18	0.15	2.26	0.15	2.12	0.11	1.8	0.36	2.16	0.28	2.12	0.13	2.22	0.13	2.12	0.13	2.12	0.13	2.18	0.12	2.05	0.21	2.03	0.17	2.01	0.15	2.1	0.29	1.97	0.18	2.12	0.27	2.05	0.19	2.21	0.17
	Coagulation time	min	5.34	0.09	5.09	0.34	5.14	0.11	4.84	0.16	4.98	0.19	5.11	0.27	5.14	0.18	5.11	0.27	5.3	0.13	5.3	0.18	5.14	0.23	4.87	0.37	5.07	0.29	5.17	0.3	5.18	0.18	5.16	0.22	5.55	0.27	5.11	0.31
	Prothrombin time	min	15	0.29	14.84	0.29	14.85	0.44	13.7	0.81	14.48	0.76	14.36	0.66	12.63	0.55	14.36	0.66	14.01	1.13	14.26	1.07	9.43	6.08	9.94	1.17	10.52	0.96	10.84	1.58	12.38	0.76	13.85	1.2	13.78	1.06	13.19	1.13
	APTT	sec	13.2	0.77	12.87	0.51	12.91	0.54	12.94	0.27	13.86	0.83	12.87	0.47	12.34	1.09	12.87	0.47	13.3	0.13	12.97	0.91	12.32	1.09	12.08	0.2	12.77	1.17	12.39	0.43	12.51	0.65	12.92	0.65	13.54	0.7	12.57	0.54
	Table 2| BLOOD BIOCHEMISTRY
			Acute study				Sub acute study																Subchronic study
	Name of Test	Unit	G1-Male (Mean)	G1-Male (SD)	G1-Female (Mean)	G1-Female (SD)	G1-M (Mean)	G1-M (SD)	G2-M (Mean)	G2-M (SD)	G3-M (Mean)	G3-M (SD)	G4-M (Mean)	G4-M (SD)	G1-F (Mean)	G1-F (SD)	G2-F (Mean)	G2-F (SD)	G3-F (Mean)	G3-F (SD)	G4-F (Mean)	G4-F (SD)	G1-M (Mean)	G1-M (SD)	G2-M (Mean)	G2-M (SD)	G3-M (Mean)	G3-M (SD)	G4-M (Mean)	G4-M (SD)	G1-F (Mean)	G1-F (SD)	G2-F (Mean)	G2-F (SD)	G3-F (Mean)	G3-F (SD)	G4-F (Mean)	G4-F (SD)
	Total Protein	(g/dl)	6.8	0.5	6.84	0.52	7.34	0.57	8.02	0.25	7.06	0.19	7.09	0.28	5.95	0.32	6.87	1	5.54	1.46	7.12	0.19	7.14	0.3	6.75	0.33	5.79	0.56	5.43	0.31	7.07	0.4	6.53	0.37	5.69	0.37	5.74	0.2
	ALT	(IU/L)	154.2	11.52	58.86	14.64	220.19	37.25	212.9	6.42	406.43	49.4	827.45	43.96	161.26	446.83	117.82	9.74	300.97	96.23	681.4	90.51	142.86	7.18	259.35	100.9	259.16	40.97	190.36	28.02	141.96	9.23	294.76	45.41	292.85	52.86	294.9	29.4
	AST	(IU/L)	821.25	94.23	488.34	156.7	1106.06	60.48	1078.24	99.03	1548.8	345.13	993.2	55.25	323.78	101.47	483.76	42.51	800.03	81.46	1183.39	137.58	427.69	56.55	967.65	32.92	1325.54	62.54	748.35	50.11	382.97	118.12	563.95	115.56	547.2	20.92	536.48	46.29
	ALP	(IU/L)	120.74	18.48	133.75	11.23	54.56	2.41	53.3	3.26	52.53	2.65	51.97	1.9	117.04	17.06	117.66	6.13	112.43	6.28	120.96	7.63	51.37	1.82	52.12	2.93	54.39	4.76	53.8	4.6	51.34	2.7	61.94	11.02	57.31	10.26	58.05	4.17
	Blood Glucose	(mg/dl)	113.12	7.08	114.06	10.93	76.84	5.76	78.34	6.49	81.54	3.73	80.62	1.65	108.65	6.42	103.65	8.37	117.34	7.89	111.13	3.76	70.24	9.63	69.93	3.16	125.52	4.5	200.65	31.95	62.71	6.75	69.53	6.24	80.49	8.97	81.27	8.91
	Cholesterol	(mg/dl)	71.92	29.98	78.72	26.85	59.6	12.83	71.46	6.85	49.78	1.47	52.01	4.45	45.58	1.67	72.54	3.01	57.52	7.16	62.3	3.61	69.59	1.34	68.23	4.8	47.49	3.2	53.53	5.38	70.63	8.51	67.16	9.83	60.82	4.65	60.08	3.76
	Triglyceride	(mg/dl)	67.8	19.44	70.08	18.96	115.55	8.64	115.18	22.51	107.38	14.68	115.01	9.52	74.38	6.47	65.91	7.71	131.17	2.93	140.78	21.49	105.29	5.46	125.48	22.9	132.92	17.23	142.47	26.13	103.03	6.57	119.23	18.93	116.47	28.59	118.57	7.33
	BUN	(mg/dl)	26.07	3.93	20.31	3.61	22.64	5.5	24.38	1.02	18.89	2.1	18.18	0.75	14.51	1.82	16.75	2.76	20.54	1.62	18.32	1.74	22.87	2.74	23.94	1.67	17.12	1.72	16.53	3.06	24.59	6.14	23.08	2.32	24.65	2.71	24.59	3.37
	Bilirubin	(mg/dl)	0.14	0.08	0.16	0.1	0.14	0.09	0.14	0.08	0.14	0.08	0.16	0.07	0.16	0.08	0.18	0.09	0.16	0.07	0.19	0.06	0.15	0.05	0.17	0.04	0.15	0.05	0.16	0.07	0.14	0.09	0.14	0.08	0.13	0.05	0.13	0.05
	Creatinine	(mg/dl)	0.71	0.05	0.6	0.06	0.77	0.14	0.93	0.14	1.07	0.18	0.87	0.13	0.97	0.16	1.09	0.26	1.28	0.69	0.95	0.12	0.86	0.09	0.92	0.19	1.16	0.05	0.85	0.23	0.79	0.1	1.13	0.16	1.06	0.19	1.01	0.15
	Albumin	(g/dL)	3.06	0.46	2.95	0.4	2.95	0.29	2.81	0.23	2.96	0.1	2.35	0.26	2.38	0.39	2.5	0.35	2.79	0.24	3.29	0.43	2.55	0.32	2.82	0.3	2.68	0.34	2.85	0.42	2.69	0.5	2.72	0.7	2.94	0.14	2.88	0.12
	Sodium	(mMol/L)	150.28	2.13	143.69	6.6	146.53	5.81	151.74	6.93	149.84	4.17	149.67	1.76	147.5	5.37	146.53	5.2	148.38	6.09	146.03	4.43	145.08	6.57	135.16	10.98	131.05	4.12	143.95	19.31	141.41	14.55	134.91	13.98	132.82	6.11	136.86	7.75
	Potassium	(mMol/L)	6.84	0.24	6.7	0.24	6.38	0.57	5.72	0.23	6.11	0.4	5.84	0.64	6.06	0.55	6.38	0.51	6.05	1.38	6.53	0.58	6.16	1.13	5.67	0.55	6.08	0.24	6.15	0.58	6.12	0.74	5.44	0.45	5.98	0.23	5.82	0.2
	Phosphorous	(mg/dl)	7.2	0.53	6.9	0.77	6.42	0.53	6.33	0.37	6.29	0.43	6.11	0.34	6.23	0.36	6.42	0.48	6.11	0.62	6.25	0.59	6.34	0.63	5.68	0.43	6.13	0.31	6.41	0.43	6.27	0.37	5.33	0.55	6.09	0.29	6.24	0.19
	Calcium	(mg/dl)	12.09	0.45	12.13	0.58	12.05	0.59	11.46	0.69	11.41	0.45	11.76	0.61	11.88	0.35	12.17	0.57	12.03	0.79	12.31	1.29	11.8	0.26	11.46	1.21	11.14	0.62	11.92	0.2	10.97	0.54	11.96	0.61	11.6	0.69	11.33	0.55
		Table 3| URINE ANALYSIS
			Acute study				Sub acute study																Subchronic study
		Volume (24 hours output)	G1-Male (Mean)	G1-Male (SD)	G2-Female (Mean)	G2-Female (SD)	G1-M (Mean)	G1-M (SD)	G2-M (Mean)	G2-M (SD)	G3-M (Mean)	G3-M (SD)	G4-M (Mean)	G4-M (SD)	G1-F (Mean)	G1-F (SD)	G2-F (Mean)	G2-F (SD)	G3-F (Mean)	G3-F (SD)	G4-F (Mean)	G4-F (SD)	G1-M (Mean)	G1-M (SD)	G2-M (Mean)	G2-M (SD)	G3-M (Mean)	G3-M (SD)	G4-M (Mean)	G4-M (SD)	G1-F (Mean)	G1-F (SD)	G2-F (Mean)	G2-F (SD)	G3-F (Mean)	G3-F (SD)	G4-F (Mean)	G4-F (SD)
		Color	10.17	0.75	11	2	10.77	0.84	11.37	0.8	10.57	0.8	11.17	0.75	10.77	0.84	11.17	0.75	11.39	0.49	11.17	0.75	11.39	0.55	11.78	0.75	11.59	0.49	11.59	0.49	11.17	0.84	11.39	0.49	11.17	0.75	11.59	0.49
		Appearance	Pale yellow	Pale yellow	Pale yellow	Pale yellow	Pale yellow	Pale yellow	Pale yellow	Pale yellow	Pale yellow to dark yellow	Pale yellow to dark yellow	Pale yellow to dark yellow	Pale yellow to dark yellow	Pale yellow	Pale yellow	Pale yellow to dark yellow	Pale yellow to dark yellow	Pale yellow to dark yellow	Pale yellow to dark yellow	Pale yellow to dark yellow	Pale yellow to dark yellow	Pale yellow	Pale yellow	Pale yellow	Pale yellow	Pale yellow to dark yellow	Pale yellow to dark yellow	Pale yellow to dark yellow	Pale yellow to dark yellow	Pale yellow	Pale yellow	Pale yellow	Pale yellow	Pale yellow to dark yellow	Pale yellow to dark yellow	Pale yellow to dark yellow	Pale yellow to dark yellow
		pH	Clear to turbid	Clear to turbid	Clear to turbid	Clear to turbid	Clear to turbid	Clear to turbid	Clear to turbid	Clear to turbid	Clear to turbid	Clear to turbid	Clear to turbid	Clear to turbid	Clear to turbid	Clear to turbid	Clear to turbid	Clear to turbid	Clear to turbid	Clear to turbid	Clear to turbid	Clear to turbid	Clear to turbid	Clear to turbid	Clear to turbid	Clear to turbid	Clear to turbid	Clear to turbid	Clear to turbid	Clear to turbid	Clear to turbid	Clear to turbid	Clear to turbid	Clear to turbid	Clear to turbid	Clear to turbid	Clear to turbid	Clear to turbid
		Sp. Gravity	7.62	0.1	7.58	0.19	7.3	0.1	7.34	0.08	7.34	0.08	7.32	0.07	7.28	0.08	7.36	0.05	7.32	0.07	7.26	0.1	7.22	0.13	7.2	0.11	7.18	0.07	7.24	0.1	7.24	0.05	7.28	0.07	7.26	0.1	7.32	0.07
		Glucose	1.18	0.04	1.18	0.04	1.22	0.02	1.22	0.01	1.22	0.01	1.21	0.01	1.22	0.02	1.22	0.01	1.22	0.01	1.23	0.01	1.22	0.01	1.23	0.02	1.22	0.01	1.23	0.01	1.21	0.01	1.22	0.01	1.23	0.01	1.23	0.01
		Ketones	0	0	0	0	0	0	0	0	0	0	0	0	0	0	0	0	0	0	0	0	0	0	0	0	0	0	0	0	0	0	0	0	0	0	0	0
		Proteins	0	0	0	0	0	0	0	0	0	0	0	0	0	0	0	0	0	0	0	0	0	0	0	0	0	0	0	0	0	0	0	0	0	0	0	0
		Bilirubin	0	0	0	0	0	0	0	0	0	0	0	0	0	0	0	0	0	0	0	0	0	0	0	0	0	0	0	0	0	0	0	0	0	0	0	0
		Urobilinogen	0	0	0	0	0	0	0	0	0	0	0	0	0	0	0	0	0	0	0	0	0	0	0	0	0	0	0	0	0	0	0	0	0	0	0	0
		Nitrite	0	0	0	0	0	0	0	0	0	0	0	0	0	0	0	0	0	0	0	0	0	0	0	0	0	0	0	0	0	0	0	0	0	0	0	0
		Occult blood	0	0	0	0	0	0	0	0	0	0	0	0	0	0	0	0	0	0	0	0	0	0	0	0	0	0	0	0	0	0	0	0	0	0	0	0
		P: Pus cell	0	0	0	0	0	0	0	0	0	0	0	0	0	0	0	0	0	0	0	0	0	0	0	0	0	0	0	0	0	0	0	0	0	0	0	0
		Epithelial cell	0	0	0	0	0	0	0	0	0	0	0	0	0	0	0	0	0	0	0	0	0	0	0	0	0	0	0	0	0	0	0	0	0	0	0	0
		C: Casts	0	0	0	0	0	0	0	0	0	0	0	0	0	0	0	0	0	0	0	0	0	0	0	0	0	0	0	0	0	0	0	0	0	0	0	0
		Red blood cell	0	0	0	0	0	0	0	0	0	0	0	0	0	0	0	0	0	0	0	0	0	0	0	0	0	0	0	0	0	0	0	0	0	0	0	0
		Cr (T): Crystals	0	0	0	0	0	0	0	0	0	0	0	0	0	0	0	0	0	0	0	0	0	0	0	0	0	0	0	0	0	0	0	0	0	0	0	0
			0	0	0	0	0	0	0	0	0	0	0	0	0	0	0	0	0	0	0	0	0	0	0	0	0	0	0		0	0	0	0	0	0	0	0
